# Supplementary material for: Assembly and dichroism of a four-component halogen-bonded metal–organic cocrystal salt solvate involving dicyanoaurate(I) acceptors
Source: Royal Society of Chemistry journal article supplement (doi:10.1039/c7fd00114b), 2017-01-01
Supplement: c7fd00114b1.pdf [file c7fd00114b1.pdf]

## Assembly and dichroism of a four-component halogen-bonded metal-organic cocrystal salt solvate involving dicyanoaurate(I) acceptors

Jan-Constantin Christopherson, Karlie P. Potts, Oleksandr S. Bushuyev, Filip Topić, Igor Huskić, Kari Rissanen, Christopher J. Barrett\* and Tomislav Frišćić\*

### Supplementary Information

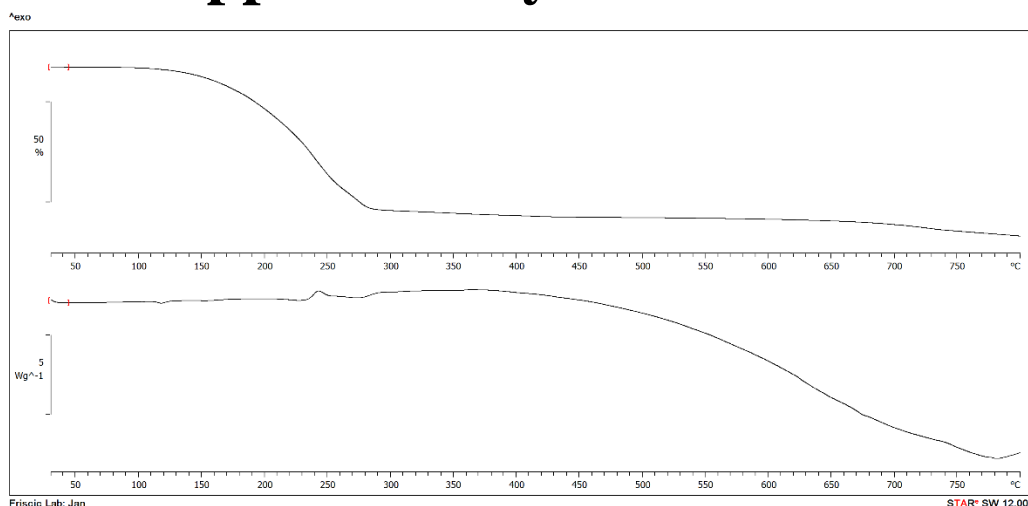

**Figure S1.** Combined TGA (top) and DSC (bottom) thermograms for **1**, recorded in a dynamic atmosphere of nitrogen. The initial sample weight was 4.30 mg, and the first thermal weight loss step amounts to ca. 74.7%.

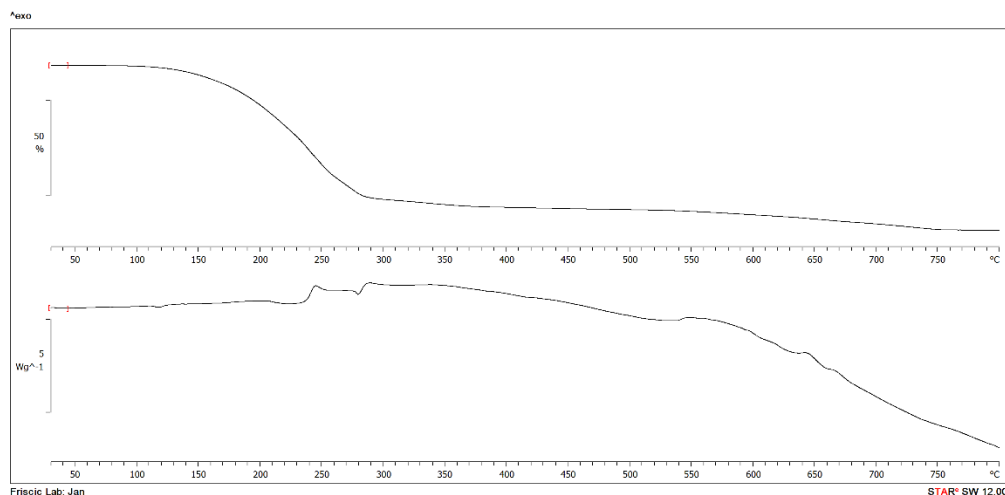

**Figure S2.** Combined TGA (top) and DSC (bottom) thermograms for **1**, recorded in a dynamic atmosphere of air. The initial sample weight was 4.82 mg, and the first thermal weight loss step amounts to ca. 73.0%.

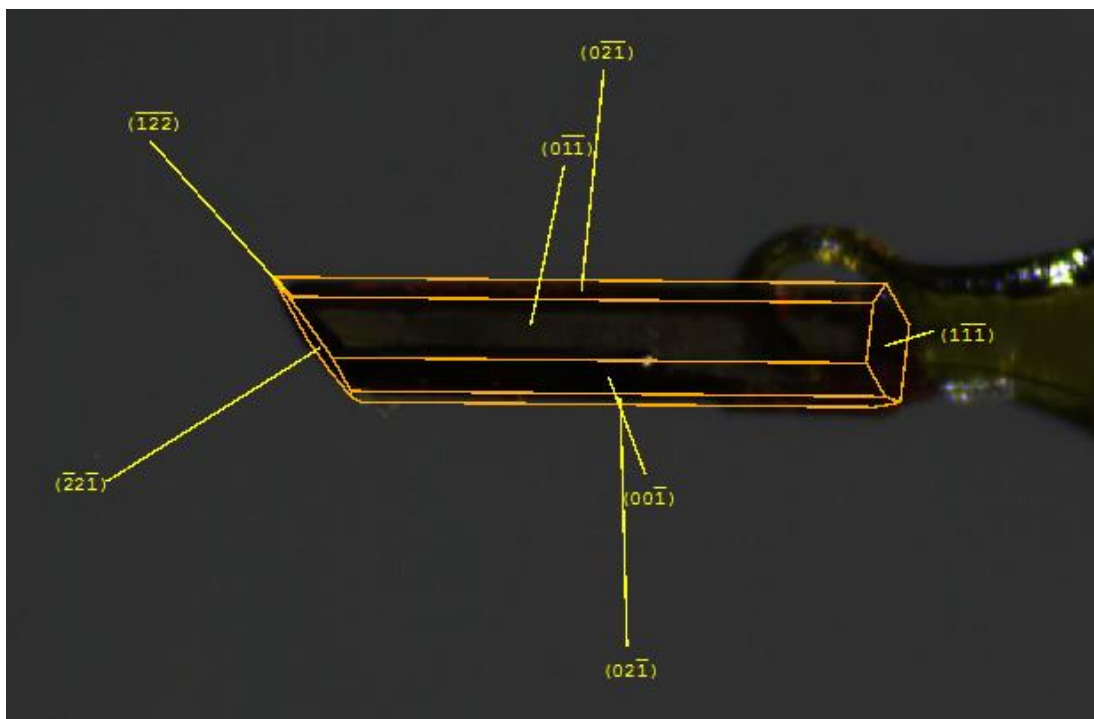

**Figure S3.** A view of a crystal of **1**, with faces indexed.
